# Supplementary material
Source: publisher figshare collection journal article supplement (https://tandf.figshare.com/ndownloader/files/15495023)
Supplement: Supplementary file 1 [file 15495023]

Appendix 1: High and low descriptors for each temperament and character dimension of the Temperament and Character Inventory.

| <b>Temperament traits</b> | <b>Represents.....</b>                                       | <b>LOW SCORES</b>                                                       | <b>to</b> | <b>HIGH SCORES</b>                                                            |
|---------------------------|--------------------------------------------------------------|-------------------------------------------------------------------------|-----------|-------------------------------------------------------------------------------|
| Novelty Seeking           | <i>Exploratory activity in response to novelty</i>           | <i>Orderly, reserved, rigid, thrifty, slow to anger</i>                 | ↔         | <i>Exploratory, impulsive, extravagant, quick-tempered</i>                    |
| Harm Avoidance            | <i>Worry in anticipation of problems</i>                     | <i>Optimistic, accepting of uncertainty &amp; risk</i>                  | ↔         | <i>Pessimistic, fearful, shy, anxious, fatigable</i>                          |
| Reward Dependence         | <i>Dependence on approval of others</i>                      | <i>Critical, aloof, detached, not influenced by others, independent</i> | ↔         | <i>Sentimental, open, warm, approval seeking, attached, dependent</i>         |
| Persistence               | <i>Industriousness of behaviour despite obstacles</i>        | <i>Underachieving, flexible, easy-going, unambitious</i>                | ↔         | <i>Industrious, ambitious, determined, perfectionist</i>                      |
| <b>Character traits</b>   | <b>Represents.....</b>                                       | <b>LOW SCORES</b>                                                       | <b>to</b> | <b>HIGH SCORES</b>                                                            |
| Self-Directedness         | <i>Responsibility, goal orientated &amp; self-confidence</i> | <i>Blaming, aimless, helpless, defensive, conflicted</i>                | ↔         | <i>Responsible, purposeful, self-accepting, resourceful, self-actualising</i> |
| Cooperativeness           | <i>Tolerance, cooperativeness &amp; empathy</i>              | <i>Prejudiced, insensitive, hostile, opportunistic,</i>                 | ↔         | <i>Tolerant, empathic, helpful, forgiving, principled</i>                     |
| Self-Transcendence        | <i>View of self in relation to the universe as a whole</i>   | <i>Conventional, sceptical, pragmatic, materialistic</i>                | ↔         | <i>Self-forgetful, holistic, idealistic, spiritual, creative</i>              |

Adapted from Eley et al. 2016
